# Supplementary material for: GUCY2D-Related Retinal Dystrophy with Autosomal Dominant Inheritance—A Multicenter Case Series and Review of Reported Data
Source: MDPI journal article supplement (doi:10.3390/genes13020313), 2022-02-08
Supplement: s1 [file s1]

## Supplement

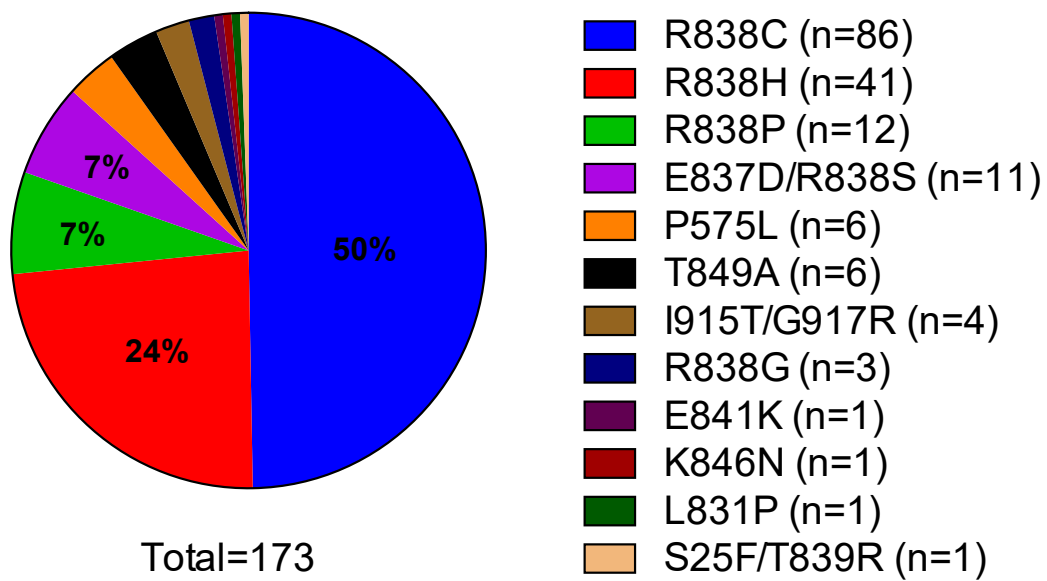

**Supplemental Figure S1:** Overview of *GUCY2D* mutation frequency (n = 173).

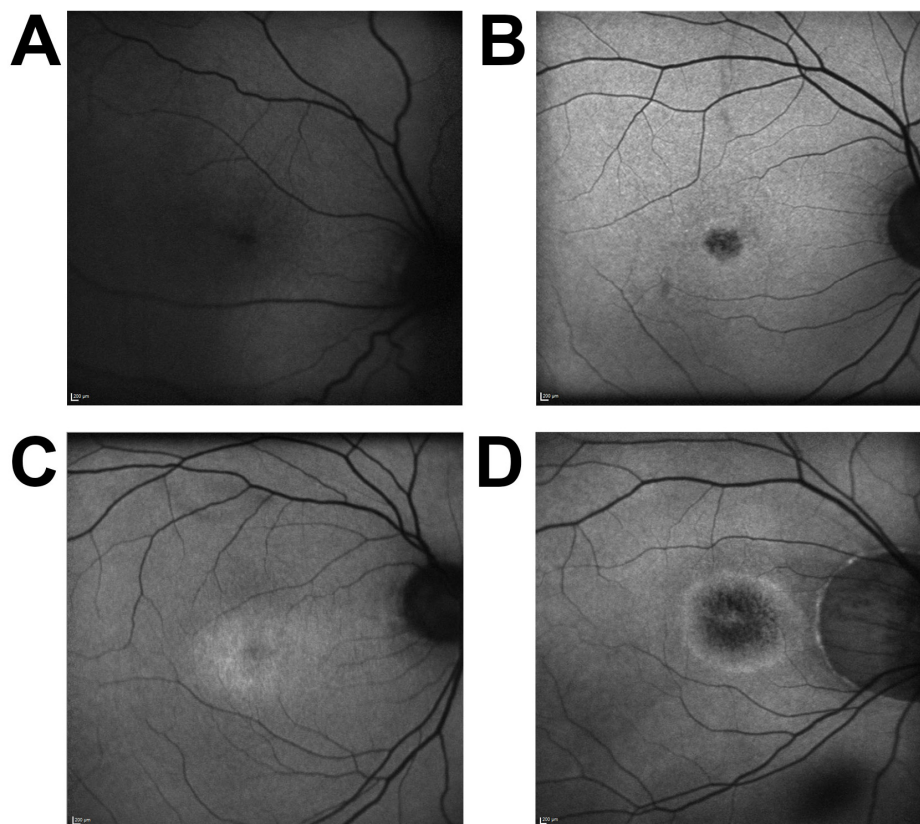

**Supplemental Figure S2:** Overview of different autofluorescence patterns. **A)** Normal autofluorescence. **B)** Central reduced autofluorescence. **C)** Central increased autofluorescence. **D)** Bulls eye.

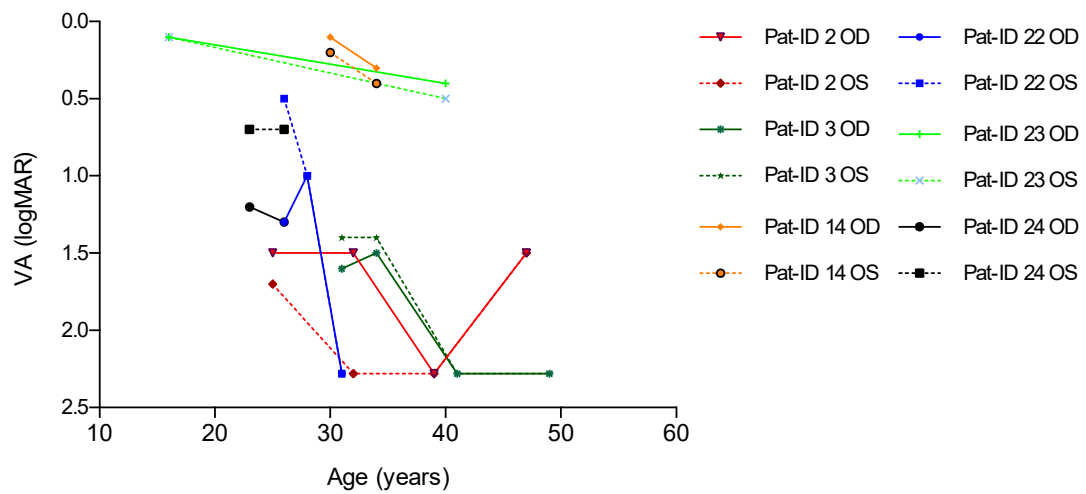

**Supplemental Figure S3:** Visual acuity values (OD and OS) associated with age in *GUCY2D* related AD COD/CORD patients who have been examined more than once.

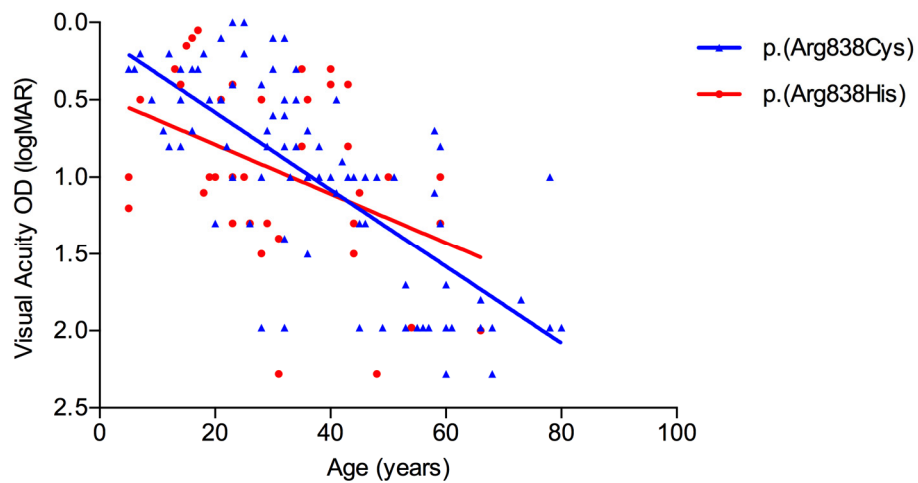

**Supplemental Figure S4:** Linear regression of visual acuity values (OD) associated with age in patients with p.(Arg838Cys) (n = 85) and p.(Arg838His) (n = 38).

**Supplemental Table S1:** Clinical data of 25 GUCY2D related AD COD/CORD patients. **(Lens 1)** 1=clear, 2=nuclear cataract, 3=cortical cataract, 4=posterior subcapsular cataract, 5=pseudophakia, 6=other; **(Fundus autofluorescence pattern 2)** 1=normal, 2=central reduced autofluorescence, 3=central increased autofluorescence, 4=bull's eye, 5=other; **(Visual field central 30° 3)** 1=normal, 2=abnormal; **(Color vision 4)** 1=normal, 2=unspecific defect, 3=tritan defect. f = female, m = male, OD = Oculus dexter, OS = Oculus sinister, N/A Not available.

| Family ID | Patient ID | Sex | Protein                     | Mutation           | Age at visit | Age at first symptoms | Major symptom at onset            | BCVA (logMAR) |      | Lens (1) |         | Ocular surgeries       | Systemic disease       | Fundus autofluorescence pattern (2) |     | Visual field central 30° (3) |     | Visual field periphery 30°-90° (3) |     | Color vision (4) |     |
|-----------|------------|-----|-----------------------------|--------------------|--------------|-----------------------|-----------------------------------|---------------|------|----------|---------|------------------------|------------------------|-------------------------------------|-----|------------------------------|-----|------------------------------------|-----|------------------|-----|
|           |            |     |                             |                    |              |                       |                                   | OD            | OS   | OD       | OS      |                        |                        | OD                                  | OS  | OD                           | OS  | OD                                 | OS  | OD               | OS  |
|           | 1          | f   | p.(Leu831Pro)               | c.2492T>C          | 45           | 40                    | Glare, dark adaption difficulties | 0             | 0    | 1        | 1       | ---                    | ---                    | 2+3                                 | 2+3 | N/A                          | N/A | N/A                                | N/A | N/A              | N/A |
| F1-III-1  | 2          | m   | p.(Arg838Gly)               | c.2512C>G          | 25           | Birth                 | Nystagmus, vision loss            | 1,5           | 1,5  | 1        | 1       | ---                    | ---                    | 2                                   | 2   | 2                            | 2   | 2                                  | 2   | 2                | 2   |
| F1-III-2  | 3          | f   | p.(Arg838Gly)               | c.2512C>G          | 42           | Birth                 | Vision loss                       | 1,98          | 1,98 | 1        | 1       | OD 2x Strabism Surgery | ---                    | N/A                                 | N/A | 2                            | 2   | 2                                  | 2   | 2                | 2   |
|           | 4          | f   | p.(Arg838Cys)               | c.2512C>T          | 21           | 18                    | Vision loss                       | 0,1           | 0,1  | 1        | 1       | ---                    | Ulcerative colitis     | N/A                                 | N/A | 2                            | 2   | 2                                  | 1   | 2                | 2   |
| F2-II-1   | 5          | f   | p.(Arg838Cys)               | c.2512C>T          | 36           | 16                    | Vision loss                       | 1             | 1    | 1        | 1       | ---                    | ---                    | 2+3                                 | 2+3 | N/A                          | N/A | N/A                                | N/A | N/A              | N/A |
| F2-III-1  | 6          | f   | p.(Arg838Cys)               | c.2512C>T          | 18           | 17                    | Vision loss                       | 0,2           | 0,2  | 1        | 1       | ---                    | ---                    | 2+3                                 | 2+3 | N/A                          | N/A | N/A                                | N/A | 2                | 2   |
|           | 7          | f   | p.(Arg838Cys)               | c.2512C>T          | 60           | 53                    | Vision loss                       | 1,7           | 2    | 4        | 4       | ---                    | ---                    | 2+3                                 | 2+3 | 2                            | 2   | 2                                  | 1   | N/A              | N/A |
|           | 8          | f   | p.(Arg838Cys)               | c.2512C>T          | 30           | Childhood             | Vision loss                       | 0,6           | 0,3  | 6        | 6       | OU Lasik               | ---                    | 2+3                                 | 2+3 | 2                            | 2   | 1                                  | 1   | N/A              | N/A |
|           | 9          | m   | p.(Arg838Cys)               | c.2512C>T          | 26           | 3                     | Vision loss                       | 1,3           | 1    | 1        | 1       | OU Artisan lens        | ---                    | 2+3                                 | 2+3 | 2                            | 2   | 1                                  | 1   | 2                | 2   |
| F3-III-1  | 10         | f   | p.(Arg838Cys)               | c.2512C>T          | 45           | 25                    | Vision loss                       | 1,98          | 1,3  | 1        | 1       | Strabismus surgery     | ---                    | 2+3                                 | 2+3 | 2                            | 2   | 2                                  | 2   | N/A              | N/A |
| F3-II-1   | 11         | f   | p.(Arg838Cys)               | c.2512C>T          | 68           | Childhood             | Vision loss                       | 2,28          | 1,98 | 2        | 2       | ---                    | Hypertension           | 2                                   | 2   | N/A                          | N/A | 2                                  | 2   | N/A              | N/A |
| F3-IV-1   | 12         | m   | p.(Arg838Cys)               | c.2512C>T          | 12           | 12                    | Vision loss                       | 0,2           | 0,2  | 1        | 1       | ---                    | ---                    | 2+3                                 | 2+3 | 2                            | 2   | 1                                  | 1   | N/A              | N/A |
|           | 13         | f   | p.(Arg838Cys)               | c.2512C>T          | 45           | 19                    | Vision loss                       | 1,3           | 1,3  | 1        | 1       | ---                    | ---                    | 2                                   | 2   | 2                            | 2   | 2                                  | 2   | 2                | 2   |
| F4-III-1  | 14         | m   | p.(Arg838Cys)               | c.2512C>T          | 34           | N/A                   | N/A                               | 0,3           | 0,4  | 1        | 1       | OU Strabism surgery    | ---                    | 3                                   | 3   | 2                            | 2   | 2                                  | 2   | 2                | 2   |
| F4-II-1   | 15         | f   | p.(Arg838Cys)               | c.2512C>T          | 58           | 54                    | Color vision, photophobia         | 1,1           | 1,1  | 4        | 2       | ---                    | Hypertension           | 4                                   | 4   | 2                            | 2   | 2                                  | 2   | 2                | 2   |
|           | 16         | m   | p.(Arg838Cys)               | c.2512C>T          | 41           | Birth                 | Vision loss                       | 1,1           | 0,8  | 1        | 1       | ---                    | ---                    | 2                                   | 2   | 2                            | 2   | 1                                  | 1   | N/A              | N/A |
| F5-IV-3   | 17         | f   | p.(Arg838His)*              | c.2513G>A*         | 43           | 15                    | Vision loss                       | 0,8           | 0,8  | 1        | 1       | ---                    | ---                    | N/A                                 | N/A | N/A                          | N/A | N/A                                | N/A | 2                | 2   |
| F5-V-1    | 18         | m   | p.Arg838His                 | c.2513G>A          | 17           | No symptoms           | No symptoms                       | 0,05          | 0    | 1        | 1       | ---                    | ---                    | N/A                                 | N/A | N/A                          | N/A | N/A                                | N/A | N/A              | N/A |
| F5-V-2    | 19         | m   | p.Arg838His                 | c.2513G>A          | 15           | 10                    | Vision loss                       | 0,15          | 0,15 | 1        | 1       | ---                    | ---                    | N/A                                 | N/A | N/A                          | N/A | N/A                                | N/A | 3                | N/A |
| F5-IV-1   | 20         | f   | p.Arg838His                 | c.2513G>A          | 35           | 26                    | Vision loss                       | 0,3           | 0,1  | 1        | 1       | ---                    | ---                    | 5                                   | 5   | 2                            | 2   | 2                                  | 2   | 2                | 2   |
| F5-III-1  | 21         | f   | p.Arg838His*                | c.2513G>A*         | 66           | 30                    | Vision loss, color vision         | 2             | 0,7  | 1        | 2 and 4 | ---                    | Rheumatoid arthritis   | 2                                   | 2   | N/A                          | N/A | N/A                                | N/A | 5                | 5   |
|           | 22         | m   | p.Arg838His                 | c.2513G>A          | 31           | N/A                   | N/A                               | 2,28          | 2,28 | 1        | 1       | ---                    | ---                    | 2                                   | 2   | 2                            | 2   | 2                                  | 2   | N/A              | N/A |
|           | 23         | f   | p.Arg838His                 | c.2513G>A          | 40           | N/A                   | N/A                               | 0,4           | 0,5  | 1        | 1       | Strabism surgery       | ---                    | 4                                   | 2   | 2                            | 2   | 1                                  | 1   | 1                | 1   |
|           | 24         | f   | p.Arg838His                 | c.2513G>A          | 26           | N/A                   | N/A                               | 1,3           | 0,7  | 1        | 1       | ---                    | Hashimoto Thyreoiditis | 1                                   | 1   | 2                            | 2   | 1                                  | 1   | 2                | 2   |
|           | 25         | f   | p.(Ser25Phe), p.(Thr839Arg) | c.74C>T, c.2516C>G | 67           | 47                    | Glare                             | 0,3           | 0,3  | 4        | 4       | ---                    | ---                    | 2+3                                 | 2+3 | 2                            | 2   | 2                                  | 1   | N/A              | N/A |

\* In this patients an additional mutation was found (GUCA1B; p.R63X; c.187C>T). The same mutation was also found in unaffected family members and not in all affected family members.
